# Supplementary material for: Chemically Functionalized Single-Walled Carbon Nanotubes Prevent the Reduction in Plasmalemmal Glutamate Transporter EAAT1 Expression in, and Increase the Release of Selected Cytokines from, Stretch-Injured Astrocytes in Vitro
Source: MDPI journal article supplement (doi:10.3390/cells13030225), 2024-01-25
Supplement: s1 [file s1]

**Chemically functionalized single-walled carbon nanotubes prevent the reduction in plasmalemmal glutamate transporter EAAT1 expression in, and increase the release of selected cytokines from, stretch-injured astrocytes *in vitro***

Nika Gržeta Krpan, Anja Harej Hrkać, Tamara Janković, Petra Dolenec, Elena Bekyarova, Vladimir Parpura, and Kristina Pilipović

***Supplementary information:***

**1. Immunocytochemistry on glial fibrillary acidic protein (GFAP) and excitatory amino acid transporter 1 (EAAT1) to assess cell culture purity.**

For the immunocytochemistry analyses, purified astrocytes were detached from flasks and seeded onto silastic membranes. Astrocytes attached to the membranes were rinsed twice with 0.01 M phosphate buffered saline (PBS) and fixed, using 4 % paraformaldehyde in PBS for 20 min. For the permeabilization, 0.2% Triton-X in PBS (PBS-TX) was used for 20 min on astrocytes to be immunostained for GFAP, while this step and the addition of detergent (Triton-X) in subsequent steps of the protocol were omitted for the EAAT1 staining. Astrocytes were then incubated with 3 % BSA in PBS or PBS-TX for 1 h to block non-specific antibody binding. Incubation with primary mouse anti-GFAP (Table 1; 1:1000 dilution) or rabbit anti-EAAT1 (Table 1; but at the dilution of 1:200) was done overnight at 4 °C. Afterwards, astrocytes were washed in PBS and incubated for 2 h with the secondary Alexa Fluor™ 488-conjugated goat anti-mouse (Cell Signaling Technology, Danvers, MA, USA; Cat. No. 4408; RRID: AB\_10694704) or DyLight™ 594-conjugated goat anti-rabbit (Abcam, Cambridge, MA, USA; Cat. No. ab96901; RRID:AB\_10679699) polyclonal antibodies, both at 1:200 dilution in PBS-TX or PBS, respectively. Membranes containing astrocytes were rinsed and mounted onto glass slides using the Mowiol mounting medium (Merck Millipore, Billerica, MA, USA). Astrocytes were visualized using an Olympus IX73 Inverted Microscope equipped with a LUCPlan FLN 40X/0.60 Ph2 objective (Olympus Corporation, Tokyo, Japan). Microphotographs were captured by the CellSense Imaging Software (Olympus Corporation, Tokyo, Japan) and analyzed by ImageJ software (NIH,

Bethesda, MD, USA). The cultures contained >99% of astrocytes based on GFAP and EAAT1 immunostaining (Figure S1).

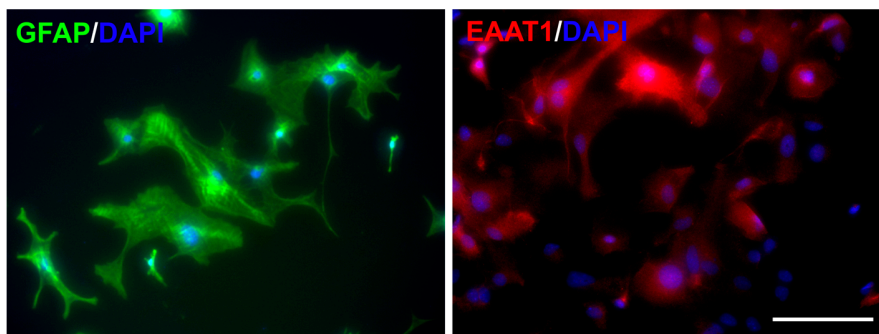

**Figure S1.** Purity of primary astrocyte culture. Immunolabeling of primary mouse astrocyte cultures with the markers GFAP (green) and EAAT1 (red) revealed pure primary astrocyte culture. Nuclei are stained with 4',6'-diamidino-2-phenylindole (DAPI) (blue). Scale bar: 100  $\mu\text{m}$ .

## 2. Polyethylene glycol functionalized single-walled carbon nanotubes

Single-walled carbon nanotubes (SWCNTs) were functionalized with the polyethylene glycol (PEG) chain of 600  $\text{gmol}^{-1}$  molecular mass. The covalent attachment of the PEG chain was achieved by reacting the carboxylic groups of the SWCNTs (introduced by reaction of the SWCNTs with nitric acid) with the hydroxyl group of PEG. Scheme S1 shows a simplified schematic illustration of the SWCNT-PEG structure.

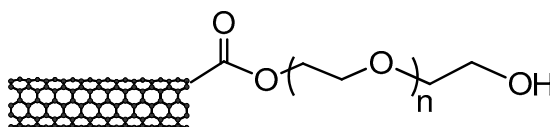

**Scheme S1.** Schematic illustration of the SWCNT-PEG structure.

The procedure for PEG functionalization of SWCNTs is described below.

Purified electric-arc-produced single-wall carbon nanotubes (SWCNTs) with carboxylic acid functionality (SWNT-COOH, P3-SWNT) were obtained from Carbon Solutions, Inc. ([www.carbonsolution.com](http://www.carbonsolution.com)) (Riverside, CA, USA). P3-SWNT material (1 g) was dispersed in dry

dimethylformamide (DMF; 1 L) by ultrasonication for 2 h and high-shear mixing for 30 min to give a homogeneous suspension. The SWCNT solute was transferred to a round-bottom flask and purged with argon. Oxalyl chloride (20 mL) was added dropwise to the SWCNT solute at 0°C under argon to convert the carboxylic acid groups to acyl chloride. The reaction mixture was stirred for 1 hour at 0 °C and 2 hours at room temperature and then heated to 70 °C for 12 hours to remove excess oxalyl chloride (boiling point 63 °C). The functionalization was performed by adding PEG (10 g) at room temperature and the mixture was heated at 120°C for 5 days. During this step the acyl chloride groups on the SWCNTs react with the OH-groups of the PEG resulting in covalent attachment of the polymer via an ester bond. After cooling to room temperature, the mixture was filtered through a 0.22- $\mu$ m Teflon membrane, washed with DMF and distilled water. SWCNT-PEG contained 72.3 weight % (wt%) SWCNTs, 22.6 wt% PEG and 5.1 wt% metal.

Due to the presence of PEG, the functionalized nanotube material can be dispersed in water by ultrasonication. Stock solution of SWCNT-PEG aqueous colloidal solute (2.0 mg/mL) was prepared by dispersing dry powder of the functionalized carbon nanotubes in purified water under ultrasonication (bath sonicator Aquasonic 50HT, VWR Scientific, Radnor, PA, USA; sonic power 75 W, frequency ~ 40 kHz). Further dilution of this stock solute was done either in purified water (for below characterization of this material) or in cell culture media (for use in experiments with astrocytes).

The material was characterized using Atomic Force Microscopy (Figure S2) to determine the nanotube morphology, mid-infrared spectroscopy (Figure S3) to assess the functional groups, thermogravimetric analysis (Figure S4) to estimate the content of remaining metal, and ultraviolet-visible-near infrared spectroscopy (Figure S5) to verify that the SWCNTs retained structural and electronic integrity after the functionalization.

Atomic Force Microscopy (AFM) was performed with a Digital Instruments Nanoscope IIIA (Digital Instruments, Santa Barbara, CA, USA) in a tapping mode using an n<sup>+</sup>-silicon cantilever with a spring constant of 40 Nm<sup>-1</sup>. The samples for AFM observation were prepared on a mica

stratum by adding a drop of a diluted SWCNT-PEG aqueous solute and allowing it to dry in air. SWCNT-PEG exist as individual nanotubes or their small bundles (Figure S2). The individual nanotubes have a diameter of 1.5 nm, while small bundles (axially aligned group of nanotubes) have a diameter of 2-7 nm; the length of SWCNT-PEG is in the range of 0.3 – 1.5  $\mu\text{m}$ .

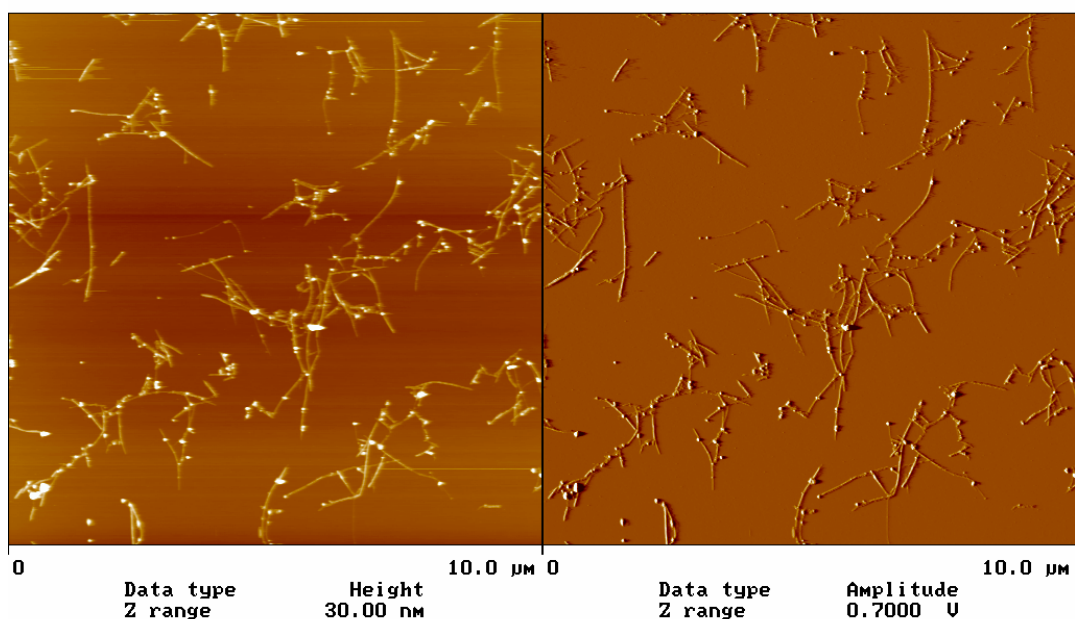

**Figure S2.** AFM height (left) and amplitude (right) images of SWCNT-PEG.

Mid infrared spectroscopy was used to identify the chemical groups present in SWCNT-PEG. Fourier transform infrared (FT-IR) spectra were obtained using a Nicolet Nexus 670 FT-IR spectrometer (Thermo-Nicolet, Madison, WI, USA) at 8  $\text{cm}^{-1}$  resolution and 200 scans in the spectral range of 400-4000  $\text{cm}^{-1}$ . Carbon nanotube aqueous solutes were deposited on a silicon stratum and dried in air at 90  $^{\circ}\text{C}$ . Figure S3 compares the spectra of SWCNT-PEG and the starting material for the functionalization, carboxylic acid group functionalized SWCNTs (SWCNT-COOH). The spectrum of SWCNT-COOH shows a signal at 1723  $\text{cm}^{-1}$ , which is due to the carbonyl stretch of the carboxylic acid groups and a broad band from 3100  $\text{cm}^{-1}$  to 3600  $\text{cm}^{-1}$  assigned to -OH groups in -COOH. In the spectrum of SWCNT-PEG the carbonyl (C=O) stretch is shifted to 1740  $\text{cm}^{-1}$ , which is representative of the ester bond formed between the carboxylic acid groups of the nanotubes and OH-groups of PEG confirming the covalent attachment of PEG to SWCNTs. The spectrum of SWCNT-PEG also exhibits the characteristic stretching vibration of

C-O-C of an ester bond, a broad band due to the O-H vibration in PEG around  $3470\text{ cm}^{-1}$  and a C=C stretch of double bonds located near the introduced oxygen-containing groups in SWCNTs at  $1590\text{ cm}^{-1}$ .

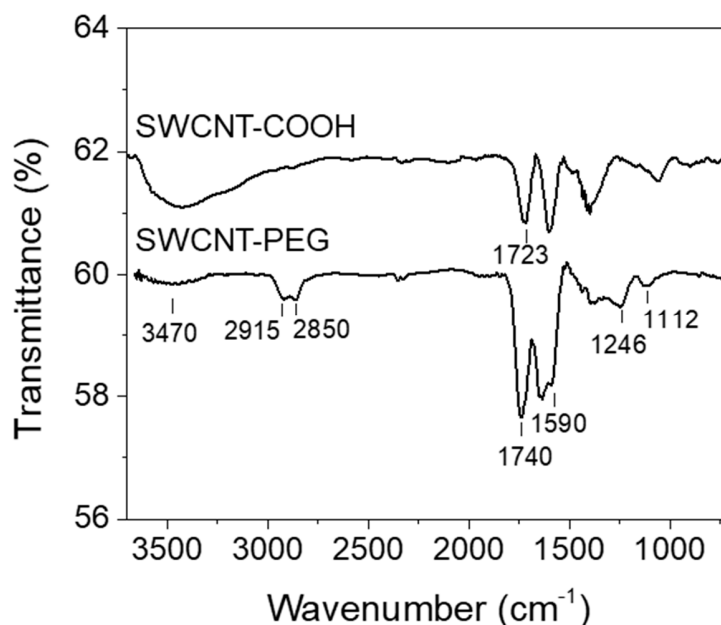

**Figure S3.** Mid-infrared spectra of SWCNT-PEG and the starting carbon nanotube materials for the functionalization SWCNT-COOH.

The thermogravimetric analysis (TGA) of SWCNT-PEG was recorded on a Pyris 1 Thermogravimetric Analyzer (Perkin-Elmer, Norwalk, CT, USA) in air at a heating rate of  $5\text{ }^{\circ}\text{C}/\text{min}$ . The weight loss as a function of temperature is shown in Figure S4. The SWCNTs are produced by the electric arc method using a catalyst containing nickel (Ni) and yttrium (Y) in a mass ratio of 2.6 to 1 (atomic ratio 4:1). Small amount of the metals remains after the SWCNT purification, which is detected in the TGA as a residue after burning the nanotubes in air at high temperature. From the residue at  $900^{\circ}\text{C}$  it is estimated that the SWCNT-PEG material contains 5.1 wt% metal (Me), *i.e.*, 3.6% Ni and 1.5 weight % Y.

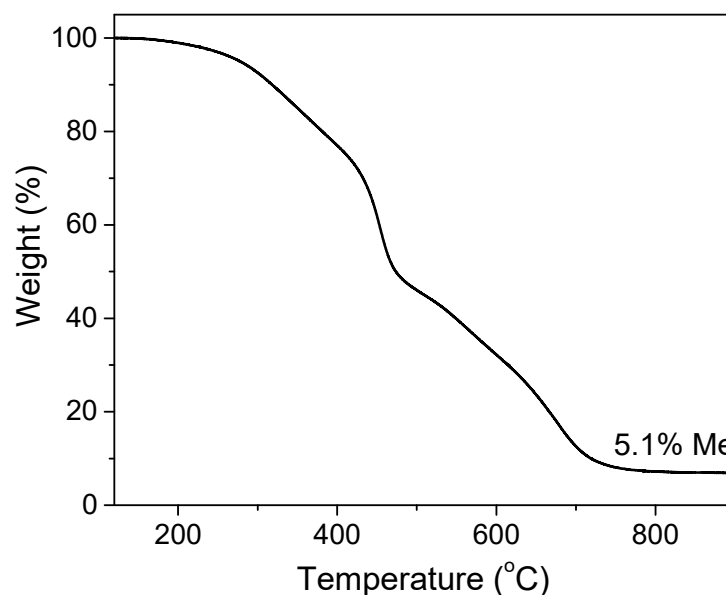

**Figure S4.** Thermogravimetric curve showing weight loss of SWCNT-PEG as a function of temperature during heating at 5 °C/min in air.

The ultraviolet-visible-near infrared (UV-Vis-NIR) spectrum of a diluted SWCNT-PEG aqueous solute was recorded on a Varian CARY 500 UV-Vis-NIR spectrophotometer (Varian Inc., Palo Alto, CA, USA) in the spectral range of 7000 - 35000  $\text{cm}^{-1}$  (Figure S5). The spectrum of SWCNT-PEG shows the characteristic interband transitions of single-wall carbon nanotubes in the NIR region – the second semiconducting ( $S_{22}$ ) and the first metallic ( $M_{11}$ ) transitions. The same characteristic bands are observed in the spectrum of SWCNT-COOH, which were used as the starting SWCNT material for the functionalization. The intensity of these peaks is related to the content of carbon nanotubes in the solute. In combination with a determination of metal content by TGA, this allows a full analysis of the composition of the SWCNT-PEG samples.

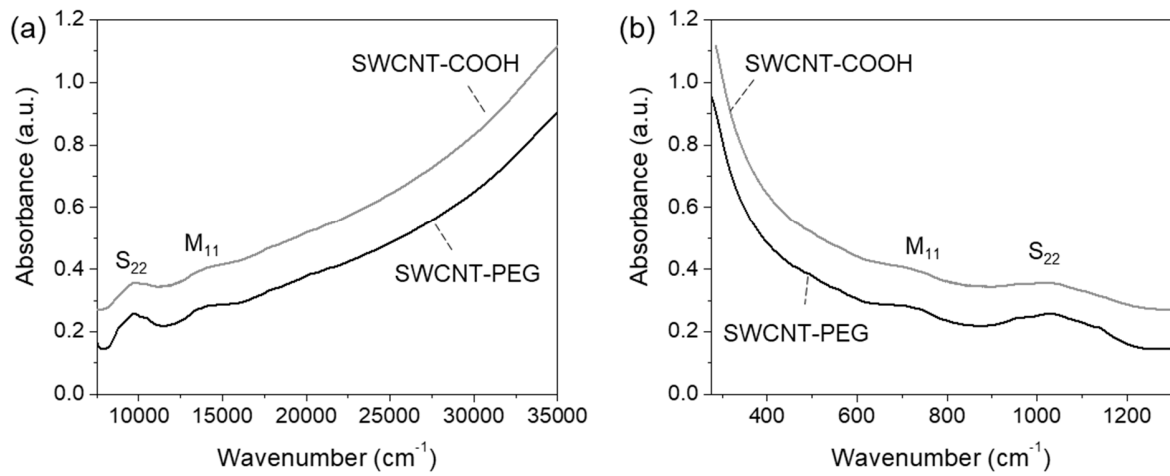

**Figure S5.** Ultraviolet-visible-near infrared red spectra of SWCNT-PEG and the starting carbon nanotube materials for the functionalization SWCNT-COOH.

### 3. Results of the cytokine analyses

**Table S1.** Results of the multiplex cytokine (listed in alphabetical order) array analysis of culture media samples from control (uninjured and PEG treated) or injured astrocytes, the latter treated with the vehicle PEG (sTBI) or SWCNT-PEG (sTBI+CNTs). Reported *p*-values are for one-way ANOVA, *F* (2,6).

|              | Control |   |       | sTBI   |   |       | sTBI+CNTs |   |       | <i>p</i> -value |
|--------------|---------|---|-------|--------|---|-------|-----------|---|-------|-----------------|
|              | Mean    | ± | SEM   | Mean   | ± | SEM   | Mean      | ± | SEM   |                 |
| axl          | 16718   | ± | 3275  | 16744  | ± | 992   | 32863     | ± | 4688  | 0.022           |
| BLC          | 72646   | ± | 13101 | 68306  | ± | 7685  | 114230    | ± | 11023 | 0.044           |
| CD30L        | 40834   | ± | 7406  | 37347  | ± | 2129  | 57518     | ± | 8129  | 0.140           |
| CD30/TNFRSF8 | 17634   | ± | 3056  | 14769  | ± | 550   | 32816     | ± | 7926  | 0.082           |
| CD40         | 12789   | ± | 3739  | 13767  | ± | 2140  | 27983     | ± | 14188 | 0.426           |
| CRG-2        | 70256   | ± | 16899 | 61489  | ± | 3534  | 132431    | ± | 40265 | 0.178           |
| CTACK        | 168821  | ± | 25588 | 149857 | ± | 27855 | 209095    | ± | 13274 | 0.259           |

|              |        |   |       |        |   |       |        |   |        |       |
|--------------|--------|---|-------|--------|---|-------|--------|---|--------|-------|
| CXCL16       | 135924 | ± | 31167 | 121224 | ± | 12164 | 206239 | ± | 22130  | 0.084 |
| Eotaxin      | 17274  | ± | 3933  | 16108  | ± | 2149  | 25180  | ± | 6360   | 0.363 |
| Eotaxin-2    | 78016  | ± | 14912 | 76439  | ± | 3788  | 152648 | ± | 40262  | 0.121 |
| FAS ligand   | 13528  | ± | 1343  | 9451   | ± | 1178  | 22810  | ± | 5006   | 0.053 |
| Fractalkine  | 218289 | ± | 46065 | 182008 | ± | 17973 | 345859 | ± | 46507  | 0.056 |
| G-CSF        | 7481   | ± | 1267  | 4680   | ± | 184   | 14255  | ± | 3482   | 0.048 |
| GM-CSF       | 51936  | ± | 11738 | 45898  | ± | 7099  | 89457  | ± | 10259  | 0.041 |
| IFN-gamma    | 17532  | ± | 3378  | 16572  | ± | 2432  | 21392  | ± | 3084   | 0.521 |
| IGF-BP-3     | 448402 | ± | 88861 | 390930 | ± | 17913 | 604411 | ± | 108635 | 0.240 |
| IGF-BP-5     | 133681 | ± | 34500 | 115008 | ± | 16867 | 175032 | ± | 18254  | 0.284 |
| IGF-BP-6     | 80456  | ± | 20720 | 69400  | ± | 9763  | 169463 | ± | 56161  | 0.166 |
| IL1-alpha    | 112183 | ± | 28635 | 91247  | ± | 14727 | 215497 | ± | 62762  | 0.148 |
| IL1-beta     | 8186   | ± | 2231  | 8152   | ± | 1474  | 19227  | ± | 4960   | 0.084 |
| IL2          | 38458  | ± | 6567  | 32970  | ± | 6227  | 58370  | ± | 7362   | 0.081 |
| IL3          | 11386  | ± | 2404  | 8363   | ± | 929   | 11350  | ± | 1123   | 0.380 |
| IL3 Rb       | 19144  | ± | 2364  | 24779  | ± | 1053  | 32123  | ± | 3800   | 0.037 |
| IL4          | 214442 | ± | 28355 | 180581 | ± | 6772  | 346468 | ± | 43122  | 0.018 |
| IL5          | 16926  | ± | 3241  | 14009  | ± | 1939  | 30137  | ± | 3592   | 0.019 |
| IL6          | 25709  | ± | 5055  | 20698  | ± | 2874  | 42066  | ± | 2905   | 0.016 |
| IL9          | 65888  | ± | 14082 | 51442  | ± | 9205  | 101808 | ± | 7296   | 0.037 |
| IL10         | 11673  | ± | 1375  | 9087   | ± | 1193  | 17373  | ± | 975    | 0.007 |
| IL12-p40/p70 | 19702  | ± | 4236  | 18016  | ± | 3715  | 27584  | ± | 1589   | 0.183 |
| IL12-p70     | 110394 | ± | 12739 | 104720 | ± | 27665 | 214345 | ± | 58593  | 0.152 |
| IL13         | 59626  | ± | 13223 | 50348  | ± | 6015  | 97722  | ± | 19530  | 0.114 |
| IL17         | 9609   | ± | 2794  | 8648   | ± | 795   | 21571  | ± | 7935   | 0.195 |
| KC           | 109413 | ± | 20505 | 100752 | ± | 12739 | 213106 | ± | 54250  | 0.107 |
| Leptin R     | 35408  | ± | 8290  | 33626  | ± | 3933  | 72109  | ± | 22581  | 0.173 |
| Leptin       | 9897   | ± | 740   | 7366   | ± | 914   | 11966  | ± | 2075   | 0.139 |



|              |        |   |       |        |   |       |        |   |       |       |
|--------------|--------|---|-------|--------|---|-------|--------|---|-------|-------|
| LIX          | 113842 | ± | 12851 | 112966 | ± | 13461 | 186224 | ± | 28028 | 0.060 |
| L-Selectin   | 14702  | ± | 2472  | 13238  | ± | 2333  | 24567  | ± | 4951  | 0.116 |
| Lymphotactin | 83926  | ± | 19325 | 63803  | ± | 5413  | 120520 | ± | 18534 | 0.107 |
| MCP-1        | 239798 | ± | 49964 | 205393 | ± | 40509 | 359565 | ± | 8713  | 0.060 |
| MCP-5        | 101423 | ± | 20104 | 72998  | ± | 9999  | 139967 | ± | 12897 | 0.052 |
| M-CSF        | 210871 | ± | 45931 | 137746 | ± | 25395 | 268783 | ± | 19732 | 0.075 |
| MIG          | 15348  | ± | 2471  | 9842   | ± | 2483  | 18248  | ± | 1373  | 0.084 |
| MIP-1-alpha  | 47635  | ± | 10362 | 35379  | ± | 5943  | 68237  | ± | 6437  | 0.064 |
| MIP-1-gamma  | 307346 | ± | 69618 | 205631 | ± | 21454 | 327544 | ± | 43082 | 0.246 |
| MIP-2        | 214940 | ± | 37607 | 173253 | ± | 23345 | 339213 | ± | 49901 | 0.052 |
| MIP-3-beta   | 61684  | ± | 10553 | 54333  | ± | 6345  | 110907 | ± | 21456 | 0.061 |
| MIP-3-alpha  | 15641  | ± | 2084  | 9752   | ± | 1472  | 19260  | ± | 4647  | 0.166 |
| PF4          | 168461 | ± | 32929 | 121861 | ± | 17546 | 225070 | ± | 51474 | 0.218 |
| P-Selectin   | 120004 | ± | 20395 | 96472  | ± | 9785  | 151060 | ± | 29478 | 0.272 |
| RANTES       | 38955  | ± | 6024  | 29829  | ± | 3325  | 43090  | ± | 8244  | 0.365 |
| SCF          | 23807  | ± | 4102  | 18179  | ± | 2934  | 25900  | ± | 6101  | 0.507 |
| SDF-1-alpha  | 113183 | ± | 28619 | 87605  | ± | 19485 | 163462 | ± | 28163 | 0.187 |
| TARC         | 115059 | ± | 30467 | 80720  | ± | 14699 | 153396 | ± | 21837 | 0.167 |
| TCA-3        | 247875 | ± | 52345 | 170076 | ± | 21707 | 296098 | ± | 35259 | 0.144 |
| TECK         | 19522  | ± | 2821  | 14837  | ± | 1203  | 22342  | ± | 1732  | 0.099 |
| TIMP-1       | 126358 | ± | 20060 | 112581 | ± | 18140 | 155062 | ± | 10080 | 0.262 |
| TNF-alpha    | 20712  | ± | 4749  | 20915  | ± | 3476  | 28785  | ± | 2109  | 0.273 |
| sTNF RI      | 147838 | ± | 28012 | 109439 | ± | 11065 | 193438 | ± | 20422 | 0.079 |
| sTNF RII     | 121439 | ± | 16069 | 90405  | ± | 5325  | 147920 | ± | 20473 | 0.097 |
| TPO          | 63183  | ± | 9848  | 57808  | ± | 7192  | 84677  | ± | 14297 | 0.257 |
| VCAM-1       | 166884 | ± | 35232 | 127283 | ± | 8685  | 213899 | ± | 41508 | 0.236 |
| VEGF         | 15228  | ± | 3170  | 13308  | ± | 1365  | 20346  | ± | 5154  | 0.412 |

**Abbreviations:** axl, tyrosine kinase receptor Axl; BLC, B lymphocyte chemoattractant; CD30L, CD30 ligand; CD30/TNFRSF8, tumor necrosis factor ligand superfamily member 8; CD40, cluster of differentiation 40; CRG-2, cytokine-responsive gene-2; CTACK, cutaneous T cell-attracting chemokine; CXCL16, chemokine (C-X-C motif) ligand 16; G-CSF, granulocyte colony-stimulating factor; GM-CSF, granulocyte-macrophage colony-stimulating factor; IFN-gamma, interferon gamma; IGF-BP-3, insulin-like growth factor-binding protein 3; IGF-BP-5, insulin-like growth factor-binding protein 5; IGF-BP-6, insulin-like growth factor-binding protein 6; IL1-alpha, interleukin 1 alpha; IL1-beta, interleukin 1 beta; IL2, interleukin 2; IL3, interleukin 3; IL3 Rb, interleukin 3 receptor beta; IL4, interleukin 4; IL5, interleukin 5; IL6, interleukin 6; IL9, interleukin 9; IL10, interleukin 10; IL12, interleukin 12; IL13, interleukin 13; IL17, interleukin 17; KC, keratinocyte-derived cytokine; LIX, lipopolysaccharide-induced CXC chemokine; MCP-1, monocyte chemoattractant protein-1; MCP-5, monocyte chemoattractant protein-5; M-CSF, macrophage colony-stimulating factor; MIG, monokine induced by gamma; MIP-1-alpha, macrophage inflammatory protein-1 alpha; MIP-1-gamma, macrophage inflammatory protein-1 gamma; MIP-2, macrophage inflammatory protein-2; MIP-3-beta, macrophage inflammatory protein-3 beta; MIP-3-alpha, macrophage inflammatory protein-3 alpha; PF4, platelet factor 4; RANTES, regulated on activation, normal T cell expressed and secreted; SCF, stem cell factor; SDF-1-alpha, stromal cell-derived factor 1 alpha; TARC, thymus- and activation-regulated chemokine; TCA-3, T-cell activation protein 3; TECK, thymus-expressed chemokine; TIMP-1, tissue inhibitor of metalloproteinases-1; TNF-alpha, tumor necrosis factor alpha; sTNF RI, human soluble tumor necrosis factor receptor I; sTNF RII, human soluble tumor necrosis factor receptor II; TPO, thrombopoietin; VCAM-1, vascular cell adhesion molecule-1; VEGF, vascular endothelial growth factor.

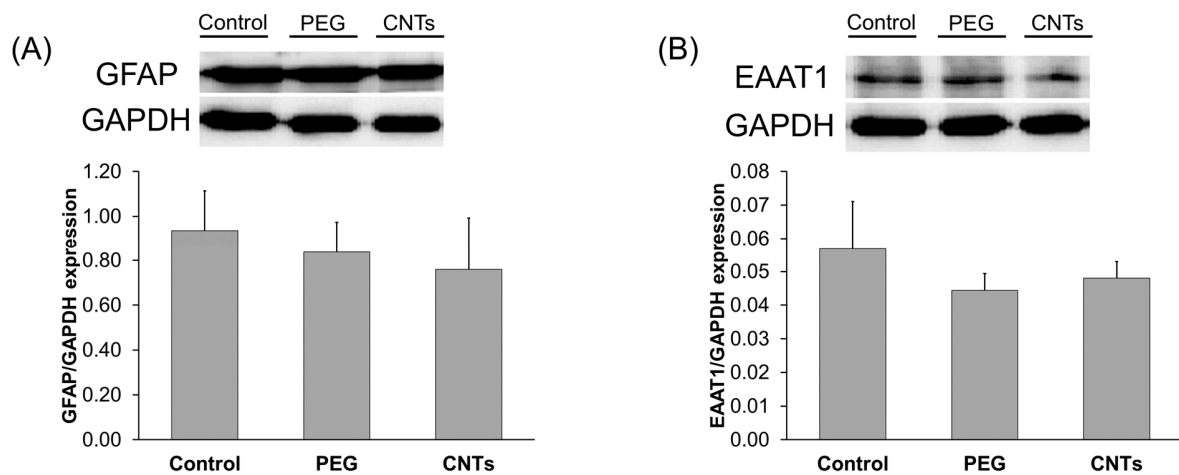

**Figure S6.** The effects of chemically functionalized single-walled carbon nanotubes (CNTs) on the protein expression of (A) GFAP and (B) EAAT1 in mouse primary astrocytes. Cells were either untreated (Control) or exposed to the vehicle (PEG at 1  $\mu\text{g}/\text{ml}$ . i.e., at the concentration corresponding to 20 wt% of the SWCNT-PEG solute) or CNTs (5  $\mu\text{g}/\text{ml}$  of SWCNT-PEG) for 23 h, equivalent to the duration of the treatment of the stretch-injured cells, with the aim to determine the effects of the vehicle and the investigated nanomaterial on astrocytes not exposed to the stretch paradigm. There were no changes in the expressions of GFAP or EAAT1 proteins between astrocytes treated with CNTs or PEG compared to the control, untreated cells. Results of the densitometric analyses were corrected for the GAPDH contents. Data are expressed as mean  $\pm$  SEM (N = 3-4).

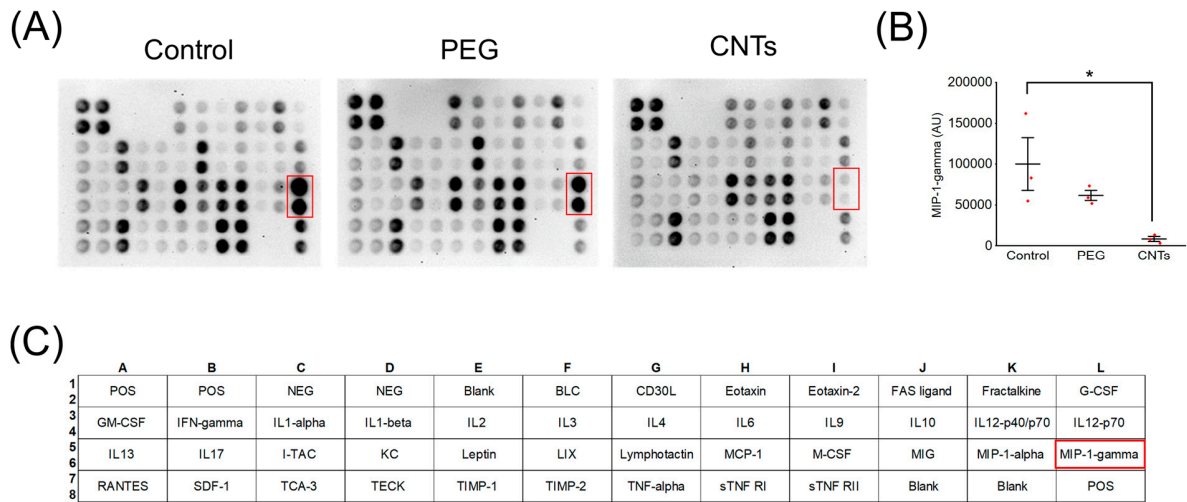

**Figure S7.** The effects of SWCNT-PEG on the secretion of selected cytokines from primary mouse astrocytes. **(A)** Representative membranes showing the content/pattern of cytokines, released from the untreated group of astrocytes (Control), PEG-treated cells (PEG), and astrocytes subjected to SWCNT-PEG treatment (CNTs). **(B)** Summary graphs showing significant decrease in signal intensity of the only cytokine, MIP-1 gamma (boxed in A and C), in the cell culture media samples from the SWCNT-PEG treated astrocytes. Data are expressed as mean  $\pm$  SEM. \* $P < 0.05$ . **(C)** Table with the list of cytokines available within the Mouse Inflammation Array C1 kit simultaneously assessing 40 mouse cytokines. Letters (A-L) and numbers (1-8) indicate coordinates (x,y) on the dot-blot. Colored boxes indicate the only protein with significant change in its expression.

**Table S2.** Results of the multiplex cytokine (listed in alphabetical order) array analysis of culture media samples from control, non-treated astrocytes, and cells treated with vehicle (PEG) or SWCNT-PEG (CNTs). Reported *p*-values are for one-way ANOVA, F (2,6).

|              | Control |   |       | PEG   |   |      | CNTs  |   |      | <i>p</i> -value |
|--------------|---------|---|-------|-------|---|------|-------|---|------|-----------------|
|              | Mean    | ± | SEM   | Mean  | ± | SEM  | Mean  | ± | SEM  |                 |
| BLC          | 12560   | ± | 3015  | 12481 | ± | 1809 | 10658 | ± | 1367 | 0.791           |
| CD30L        | 6816    | ± | 1474  | 5824  | ± | 886  | 5772  | ± | 598  | 0.742           |
| Eotaxin      | 2670    | ± | 717   | 1910  | ± | 145  | 1701  | ± | 302  | 0.353           |
| Eotaxin-2    | 8900    | ± | 1374  | 8638  | ± | 604  | 8864  | ± | 766  | 0.979           |
| FAS ligand   | 2846    | ± | 189   | 2742  | ± | 110  | 2687  | ± | 278  | 0.858           |
| Fractalkine  | 15659   | ± | 1178  | 15866 | ± | 1025 | 17410 | ± | 271  | 0.394           |
| G-CSF        | 2504    | ± | 62    | 3050  | ± | 429  | 2983  | ± | 431  | 0.528           |
| GM-CSF       | 8466    | ± | 2400  | 7473  | ± | 1065 | 6487  | ± | 925  | 0.700           |
| IFN-gamma    | 2330    | ± | 405   | 1898  | ± | 226  | 1136  | ± | 138  | 0.059           |
| IL1-alpha    | 23515   | ± | 4326  | 21113 | ± | 1366 | 18503 | ± | 1893 | 0.500           |
| IL1-beta     | 1862    | ± | 205   | 2371  | ± | 930  | 1060  | ± | 303  | 0.336           |
| IL2          | 4488    | ± | 1028  | 4381  | ± | 151  | 3934  | ± | 640  | 0.844           |
| IL3          | 1913    | ± | 501   | 2295  | ± | 152  | 1956  | ± | 314  | 0.716           |
| IL4          | 31027   | ± | 11283 | 18523 | ± | 3996 | 11987 | ± | 2978 | 0.237           |
| IL6          | 2819    | ± | 428   | 2612  | ± | 334  | 1986  | ± | 246  | 0.280           |
| IL9          | 7597    | ± | 799   | 7781  | ± | 184  | 8436  | ± | 621  | 0.603           |
| IL10         | 1744    | ± | 121   | 2132  | ± | 171  | 1863  | ± | 207  | 0.324           |
| IL12-p40/p70 | 3070    | ± | 544   | 3006  | ± | 626  | 3283  | ± | 791  | 0.954           |
| IL12-p70     | 16631   | ± | 983   | 15564 | ± | 1239 | 17786 | ± | 1237 | 0.449           |
| IL13         | 6324    | ± | 1505  | 6905  | ± | 958  | 7039  | ± | 998  | 0.903           |
| IL17         | 2336    | ± | 355   | 2610  | ± | 220  | 2006  | ± | 368  | 0.460           |
| I-TAC        | 2797    | ± | 471   | 2618  | ± | 166  | 2058  | ± | 235  | 0.303           |

|                 |        |   |       |       |   |      |       |   |      |       |
|-----------------|--------|---|-------|-------|---|------|-------|---|------|-------|
| KC              | 16338  | ± | 3828  | 16306 | ± | 1882 | 13862 | ± | 3390 | 0.821 |
| Leptin          | 1306   | ± | 347   | 1339  | ± | 146  | 1258  | ± | 297  | 0.979 |
| LIX             | 42406  | ± | 7081  | 38489 | ± | 3903 | 33905 | ± | 2487 | 0.508 |
| Lymphotactin    | 11457  | ± | 1088  | 11111 | ± | 752  | 10266 | ± | 782  | 0.642 |
| MCP-1           | 22598  | ± | 1744  | 20876 | ± | 3223 | 24203 | ± | 3872 | 0.757 |
| M-CSF           | 26969  | ± | 2142  | 30575 | ± | 716  | 28239 | ± | 2334 | 0.438 |
| MIG             | 1023   | ± | 242   | 1521  | ± | 253  | 1533  | ± | 252  | 0.325 |
| MIP-1-alpha     | 9421   | ± | 2369  | 7722  | ± | 753  | 10407 | ± | 2559 | 0.666 |
| MIP-1-<br>gamma | 100010 | ± | 32148 | 61422 | ± | 6244 | 8175  | ± | 2957 | 0.038 |
| RANTES          | 10348  | ± | 1620  | 8082  | ± | 212  | 5814  | ± | 1087 | 0.079 |
| SDF-1           | 7165   | ± | 1010  | 5958  | ± | 291  | 5038  | ± | 477  | 0.157 |
| TCA-3           | 32171  | ± | 5981  | 29170 | ± | 2886 | 29705 | ± | 2865 | 0.866 |
| TECK            | 2424   | ± | 187   | 4090  | ± | 655  | 4439  | ± | 724  | 0.098 |
| TIMP-1          | 5416   | ± | 517   | 6486  | ± | 614  | 4841  | ± | 51   | 0.112 |
| TIMP-2          | 5168   | ± | 391   | 5111  | ± | 411  | 4079  | ± | 183  | 0.115 |
| TNF-alpha       | 4538   | ± | 353   | 5264  | ± | 457  | 4890  | ± | 118  | 0.381 |
| sTNF RI         | 40916  | ± | 4356  | 36272 | ± | 1380 | 40744 | ± | 3058 | 0.538 |
| sTNF RII        | 20143  | ± | 3752  | 20787 | ± | 1113 | 29477 | ± | 4157 | 0.162 |

**Abbreviations.** As in Table S1 with the exception of I-TAC, interferon-inducible T cell alpha chemoattractant.
